# Supplementary material
Source: PubMed Central journal article supplement (PMC7832430)
Supplement: mmc1.pdf [file mmc1.pdf]

# THE LANCET

## Rheumatology

### Supplementary appendix

This appendix formed part of the original submission. We post it as supplied by the authors.

Supplement to: Perrot L, Hemon M, Busnel J-M, Muis-Pistor O, et al. First flare of ACPA-positive rheumatoid arthritis after SARS-CoV-2 infection. *Lancet Rheumatol* 2020; published online Nov 23. [https://doi.org/10.1016/S2665-9913\(20\)30396-9](https://doi.org/10.1016/S2665-9913(20)30396-9)

**First Flare of ACPA-positive Rheumatoid Arthritis after SARS-CoV-2 infection**  
**Appendix Methods and Table**

**Methods**

**Antibodies**

**Anti-citrullinated proteins ACPA** were detected by two Enzyme-linked immunosorbent assay (ELISA) tests: anti-CCP2 (Immunoscan RA CCP+ SFAR Euro-Diagnostica, Arnhem, the Netherlands) and anti-CCP3 (QUANTA Lite® CCP3 IgG ELISA, Inova Diagnostics, San Diego, CA, USA)

**Antinuclear antibodies (ANA)** were detected by indirect immunofluorescence on HEp-2 cells (Kallestad HEp-2 Cell Line Substrate, 12 well slides, Bio-Rad Laboratories, Hercules, CA, USA) at a screening dilution of 1:160.

Anti-ENA and anti-dsDNA antibodies were detected by commercially available kits (EliA dsDNA; Phadia, Uppsala, Sweden; now part of Thermo Fisher Scientific).

**Human IgM Rheumatoid Factors** were detected with a commercially available ELISA kit (FR-LISA IgM, Théradiag, Croissy-Beaubourg, France) according to the manufacturer's instructions.

**Anti-SARS-CoV-2 Spike Protein IgG** antibodies were detected with a commercially available ELISA kit (ELISA SARS-CoV-2 IgG, EuroImmun, Lübeck, Germany).

**Serum IL6** was quantified with the Human IL-6 Elisa kit II from BD Biosciences (San José, CA, USA) with a limit detection of 2.2 pg/ml.

**HLA genotyping:**

DNA was extracted from peripheral blood using LabTurbo (Taigen, Taiwan). The sample was typed for HLA-A, -B, -C, -DRB1 and –DQB1 loci by next-generation sequencing in Illumina MiniSeq using NG-Mix® kit (Reagent Production Unit, EFS, France), according to the manufacturer's instructions.

**T-cell proliferation assay.** Mononuclear cells from patients were isolated from 20 ml of heparinized blood by centrifugation through Ficoll-Histopaque (Sigma Aldrich, St. Quentin-Fallavier, France). Cells were cultured at a density of  $10^6$  cells/ml in RPMI 1640 with 10% self-serum in the presence of 1  $\mu$ g/ml of **human PAD4\***, **human PAD2\*** or **human fibrinogen\*\*** (native or citrullinated) or PHA (phytohemagglutinin) or 5 microg/ml of **PAD4 synthetic peptide (P8)\*\*\***. After 6 days of culture at 37°C, proliferative response to proteins was evaluated using the colorimetric bromodeoxyuridine kit (Roche Diagnostics, Meylan, France) (19). Positive T cell responses were defined by optical densities (OD) higher than twice the control.

**Flow Cytometry.** 250  $\mu$ L aliquots of whole blood were incubated at 37°C for 4 hours with or without 2  $\mu$ g of PAD4, PAD2 and peptide 8 from PAD4. Incubation was performed in the presence of brefeldin (5  $\mu$ g/mL). Post incubation, an adapted IntraPrep (Beckman Coulter, Marseille, France (BCMF)) protocol was implemented. Extracellular markers (anti-CD19-ECD, anti-CD4-PC5.5, anti-CD27-A750 and anti-CD8-KrO) were first added to whole blood and incubated for 30 minutes in the dark at room temperature (RT). 400  $\mu$ L of Optilyse C (BCMF) were then added to the tubes. After 10 minutes, 500  $\mu$ L of Intraprep reagent 1 (BCMF) were used to enable a strong fixation of the cells prior to the permeabilizing step. After 15 minutes, tubes were centrifuged (300 g, 5 min) and the supernatant discarded. 4 mL of PBS were added to the cell pellet and another centrifugation step was carried out (300g, 5 min). Intracellular markers (anti-IFN $\gamma$ -FITC, anti-CD154-PE, 1 anti-IL4-PC7, anti-IL10-A647, anti-TNF-A700, anti-IL17-PB) were added and 300  $\mu$ L of Intraprep reagent 2 (BCMF) were used to enable cell permeabilization. Tubes were left in the dark at RT for 60 minutes. 4 mL of PBS were added into the tubes and a last centrifugation step carried out (350g, 5 min). 250  $\mu$ L of PBS were finally added. Cell suspensions were analyzed on a Cytoflex flow cytometer (Beckman Coulter, Miami, USA). Anti-IL10-A647 was from Biolegend (San Diego, USA), all other conjugated antibodies were from BCMF.

**Human PAD4\* and PAD2** was produced in a baculovirus expression system and purified (Proteogenix, Schiltigheim, France). **Human fibrinogen\*\*** (Merck Millipore, Darmstadt, Germany) was incubated in 1 M Tris HCl (pH7.4), 100 mM CaCl<sub>2</sub>, 50 mM

dithiothreitol buffer at a concentration of 1 mg/ml with rabbit PAD2 protein (Sigma Aldrich, St. Quentin-Fallavier, France).

**Synthetic peptide 8 from human PAD4<sup>\*\*\*</sup>** p8: DPGVEVTLTMKAASGSTGDQ, a 20 mer peptide previously associated with RA (11) was synthesized using the solid-phase system and purified (>70%) (Neosystem, Strasbourg, France).

**Table :**

Progression of inflammation markers and autoantibodies.

| <b>Year 2020</b>                     | <b>April 27</b> | <b>May 1</b>    | <b>May 11</b>   | <b>June 8</b>      | <b>July 15</b>     |
|--------------------------------------|-----------------|-----------------|-----------------|--------------------|--------------------|
| <b>Sars-Cov-2 symptoms</b>           | <b>YES</b>      | <b>YES</b>      | <b>YES</b>      | <b>NO</b>          | <b>NO</b>          |
| <b>RT PCR Sars-Cov-2</b>             | <b>UK</b>       | <b>Positive</b> | <b>Negative</b> | <b>UK</b>          | <b>UK</b>          |
| <b>Sars-Cov-2 serology</b>           | <b>UK</b>       | <b>Negative</b> | <b>Positive</b> | <b>UK</b>          | <b>Positive</b>    |
| <b>Rheumatoid arthritis symptoms</b> | <b>UK</b>       | <b>NO</b>       | <b>NO</b>       | <b>YES</b>         | <b>YES</b>         |
| <b>C reactive protein (mg/l)</b>     | <b>UK</b>       | <b>1</b>        | <b>1</b>        | <b>1.5</b>         | <b>18</b>          |
| <b>Sedimentation rate (mm)</b>       | <b>UK</b>       | <b>UK</b>       | <b>UK</b>       | <b>UK</b>          | <b>97</b>          |
| <b>IL6 (N&lt;2 pg/ml)</b>            | <b>UK</b>       | <b>2,2</b>      | <b>UK</b>       | <b>18</b>          | <b>31</b>          |
| <b>Rheumatoid Factor N&lt; 20</b>    | <b>UK</b>       | <b>Negative</b> | <b>UK</b>       | <b>23</b>          | <b>21</b>          |
| <b>ACPA Anti CCP-2 kit N&lt;25</b>   | <b>UK</b>       | <b>27</b>       | <b>UK</b>       | <b>UK</b>          | <b>76</b>          |
| <b>ACPA Anti CCP-3 kit N&lt;20</b>   | <b>UK</b>       | <b>450</b>      | <b>UK</b>       | <b>450</b>         | <b>625</b>         |
| <b>Anti nuclear antibodies</b>       | <b>UK</b>       | <b>UK</b>       | <b>UK</b>       | <b>&gt; 1/1280</b> | <b>&gt; 1/1280</b> |
| <b>Anti SSA (N &lt;10 U/mL)</b>      | <b>UK</b>       | <b>UK</b>       | <b>UK</b>       | <b>UK</b>          | <b>240</b>         |
| <b>Anti SSB (N &lt;10 U/mL)</b>      | <b>UK</b>       | <b>UK</b>       | <b>UK</b>       | <b>UK</b>          | <b>79</b>          |
| <b>Anti PAD4 antibodies</b>          | <b>UK</b>       | <b>Positive</b> | <b>UK</b>       | <b>UK</b>          | <b>Positive</b>    |

**UK: unknown, ACPA : anti-citrullinated antibodies, PAD4 : Peptidyl arginine deiminase, N normal**
